# Supplementary material
Source: publisher site journal article supplement (https://www.spandidos-publications.com/2157/downloadSupplementary)
Supplement: Supplementary file 2 [file downloadSupplementary]

## Sheet: Table SIV
Table SIV. Analysis of differentially expressed miRNAs co-expressed in the HUVEC, HUVEC treated with H2O2, and HUVEC treated with H2O2 + Vitamin C.
Gene ID	HUVEC-H2O2-TPM	HUVEC-NC-TPM	Log2Ratio (HUVEC-NC/HUVEC-H2O2)	Up-Down-Regulation (HUVEC-NC/HUVEC-H2O2)	P-value	FDR	HUVEC-H2O2-TPM	HUVEC-Vc-H2O2-TPM	Log2Ratio (HUVEC-Vc-H2O2/HUVEC-H2O2)	Up-Down-Regulation (HUVEC-Vc-H2O2/HUVEC-H2O2)	P-value	FDR
hsa-miR-8055	0.956556	3.94479	2.04403	Up	9.62486e-05	0.000644144	0.956556	33.9295	5.14855	Up	4.8954e-76	1.42462e-74
hsa-miR-548aw	6.69589	21.532	1.68513	Up	1.64792e-15	2.01327e-14	6.69589	112.468	4.0701	Up	1.05498e-213	7.00612e-212
hsa-miR-3928-5p	3.71994	11.2591	1.59774	Up	4.14154e-08	3.71162e-07	3.71994	56.1784	3.91666	Up	2.08692e-104	7.7216e-103
hsa-miR-323a-5p	1.91311	16.1901	3.08112	Up	1.16002e-25	1.77779e-24	1.91311	27.4774	3.84425	Up	4.42212e-51	9.01834e-50
hsa-miR-4788	2.86967	7.97176	1.47401	Up	1.82611e-05	0.000134747	2.86967	39.2693	3.77444	Up	2.75244e-71	7.6654e-70
hsa-miR-378g	1.27541	4.76662	1.90201	Up	4.6294e-05	0.000319737	1.27541	15.2405	3.57888	Up	2.5623e-27	3.13036e-26
hsa-miR-422a	4.46393	15.6148	1.80653	Up	7.4924e-13	7.98573e-12	4.46393	51.7286	3.53458	Up	2.99686e-88	1.00803e-86
hsa-miR-1237-3p	11.3724	23.0113	1.01681	Up	3.5718e-07	3.0331e-06	11.3724	129.266	3.50674	Up	2.06234e-216	1.40565e-214
hsa-miR-4297	2.12568	6.16373	1.53588	Up	9.80514e-05	0.000654518	2.12568	18.0216	3.08373	Up	6.06698e-28	7.6279e-27
hsa-miR-3687	6.58961	18.2447	1.46921	Up	7.7654e-11	7.67648e-10	6.58961	55.2885	3.06871	Up	3.60028e-82	1.11009e-80
hsa-miR-4664-3p	9.14043	46.68	2.35247	Up	9.0355e-52	1.88725e-50	9.14043	74.645	3.02971	Up	7.06132e-109	2.72967e-107
hsa-miR-141-3p	2.86967	12.3275	2.10292	Up	8.74156e-13	9.27895e-12	2.86967	23.1388	3.01136	Up	1.26289e-34	1.84795e-33
hsa-miR-8485	0.850272	3.86261	2.18358	Up	5.18e-05	0.000356814	0.850272	6.56342	2.94845	Up	1.47215e-10	9.09995e-10
hsa-miR-203a-3p	0.425136	2.87641	2.75827	Up	5.46278e-05	0.000374302	0.425136	3.22609	2.92379	Up	9.88974e-06	3.84024e-05
hsa-miR-4277	4.6765	12.0809	1.36923	Up	7.41378e-07	6.11519e-06	4.6765	32.8171	2.81095	Up	4.86774e-45	8.94145e-44
hsa-miR-6852-5p	4.35764	13.3958	1.62017	Up	1.34314e-09	1.29804e-08	4.35764	30.036	2.78507	Up	6.16942e-41	1.05124e-39
hsa-miR-8083	3.2948	8.54705	1.37523	Up	3.07796e-05	0.000217812	3.2948	20.8027	2.65851	Up	2.24664e-27	2.75772e-26
hsa-miR-885-5p	0.637704	7.88958	3.62899	Up	3.4271e-15	4.09041e-14	0.637704	3.89355	2.61013	Up	4.88208e-06	1.9665e-05
hsa-miR-6514-3p	9.35299	26.6273	1.50941	Up	7.45754e-16	9.19763e-15	9.35299	56.7346	2.60073	Up	3.9203e-70	1.0688e-68
hsa-miR-1261	94.4865	212.936	1.17224	Up	1.46265e-72	3.50765e-71	94.4865	565.01	2.5801	Up	0	0
hsa-miR-513c-3p	6.05819	17.505	1.53081	Up	3.90808e-11	3.92323e-10	6.05819	35.042	2.53213	Up	1.39996e-42	2.46659e-41
hsa-miR-6728-5p	7.12103	36.5715	2.36056	Up	4.40744e-41	8.45576e-40	7.12103	37.3781	2.39204	Up	2.72838e-42	4.77467e-41
hsa-miR-6717-5p	1.38169	14.1355	3.35481	Up	1.68005e-24	2.51522e-23	1.38169	7.23089	2.38774	Up	2.81588e-09	1.60289e-08
hsa-miR-375	0.743988	6.41028	3.10704	Up	5.44472e-11	5.44472e-10	0.743988	3.89355	2.38774	Up	1.5207e-05	5.81773e-05
hsa-miR-369-5p	25.7207	98.2088	1.93292	Up	5.7053e-81	1.42084e-79	25.7207	131.602	2.35518	Up	9.34586e-142	4.84116e-140
hsa-miR-1273h-3p	63.1327	130.589	1.04857	Up	2.86784e-36	5.26788e-35	63.1327	322.053	2.35084	Up	0	0
hsa-miR-567	10.2033	23.2578	1.18869	Up	1.79335e-09	1.72669e-08	10.2033	51.5062	2.33571	Up	5.88952e-56	1.25032e-54
hsa-miR-4663	1.06284	4.19134	1.97949	Up	8.52492e-05	0.000572009	1.06284	5.22849	2.29847	Up	9.01292e-07	4.0109e-06
hsa-miR-1298-5p	13.8169	71.5815	2.37315	Up	1.9952e-79	4.92149e-78	13.8169	66.3017	2.26261	Up	1.13358e-68	2.96563e-67
hsa-miR-5091	6.05819	15.5326	1.35834	Up	2.39504e-08	2.16138e-07	6.05819	28.5898	2.23854	Up	4.02834e-30	5.35046e-29
hsa-miR-323b-3p	59.3065	135.438	1.19137	Up	2.8759e-48	5.86502e-47	59.3065	246.851	2.05738	Up	3.5204e-220	2.46428e-218
hsa-miR-4473	3.82622	15.2861	1.99822	Up	1.66205e-14	1.92175e-13	3.82622	14.6843	1.94028	Up	1.61654e-13	1.18607e-12
hsa-miR-200a-3p	6.69589	17.6694	1.3999	Up	9.04678e-10	8.80871e-09	6.69589	25.3637	1.92142	Up	5.24296e-22	5.47551e-21
hsa-miR-200b-3p	1.59426	19.9705	3.64691	Up	1.01488e-36	1.87754e-35	1.59426	5.56222	1.80277	Up	1.94978e-05	7.35069e-05
hsa-miR-450a-2-3p	4.78278	10.6838	1.1595	Up	7.57596e-05	0.000513658	4.78278	16.4642	1.78341	Up	2.1562e-13	1.5643e-12
hsa-miR-215-5p	6.48333	13.7246	1.08196	Up	2.838e-05	0.000201381	6.48333	19.134	1.56134	Up	1.01e-12	7.03202e-12
hsa-miR-221-5p	50.8038	134.041	1.39966	Up	2.1303e-64	4.79781e-63	50.8038	129.155	1.34609	Up	1.92633e-60	4.45463e-59
hsa-miR-16-2-3p	38.5811	114.317	1.56707	Up	3.98992e-67	9.39445e-66	38.5811	91.7766	1.25023	Up	2.15098e-38	3.46027e-37
hsa-miR-132-5p	13.9232	42.653	1.61516	Up	2.2739e-27	3.65801e-26	13.9232	31.5934	1.18213	Up	5.1234e-13	3.63551e-12
hsa-miR-30e-5p	15.6238	36.9002	1.23989	Up	2.55678e-15	3.09442e-14	15.6238	34.597	1.14691	Up	1.93457e-13	1.41142e-12
hsa-miR-26b-5p	89.7037	217.703	1.27912	Up	1.20748e-87	3.0964e-86	89.7037	189.338	1.07772	Up	1.93035e-59	4.34748e-58
hsa-let-7a-2-3p	9.77813	1.31493	-2.89457	Down	4.44846e-22	6.3305e-21	9.77813	3.44858	-1.50356	Down	6.86104e-09	3.77284e-08
